# Supplementary material for: Single-cell transcriptome of Nepeta tenuifolia leaves reveal differentiation trajectories in glandular trichomes
Source: Front Plant Sci. 2022 Oct 19;13:988594. doi: 10.3389/fpls.2022.988594 (PMC9627484; doi:10.3389/fpls.2022.988594)
Supplement: Supplementary file 6 [file Table_6.xlsx]

## Sheet: Sheet1
Tabele S6 The GC-MS analysis of compounds from PGTs.
Name	RT	CAS
1-Octen-3-ol	6.768	3391-86-4
β-Myrcene	7.011	123-35-3
1,3,8-p-Menthatriene	7.357	18368-95-1
Limonene	7.954	5989-27-5
Carveol	10.579	99-48-9
Cyclohexanone	13.688	29606-79-9
Pulegone	18.276	89-82-7
cis-p-Mentha-2,8-dien-1-ol	25.73	3886-78-0
2-Cyclohexen-1-one	26.059	491-09-8
Caryophyllene	29.6	87-44-5
Humulene	30.859	6753-98-6
Germacrene D	31.849	23986-74-5
